# Supplementary material for: Reaction vessel- and concentration-induced supramolecular isomerism in layered lanthanide-organic frameworks
Source: Royal Society of Chemistry journal article supplement (doi:10.1039/c1ce05839h), 2011-01-01
Supplement: c1ce05839h.pdf [file c1ce05839h.pdf]

## Supporting Information for

# Reaction Vessel- and Concentration-induced Supramolecular Isomerism in Layered Lanthanide-Organic Frameworks

Peipei Cui,<sup>a</sup> Jianmin Dou,<sup>b</sup> Di Sun,<sup>a</sup> Fangna Dai,<sup>a</sup> Suna Wang,<sup>b</sup> Daofeng Sun,<sup>\*,a</sup> and Qingyin Wu<sup>\*,c</sup>

<sup>a</sup> Key Lab for Colloid and Interface Chemistry of Education Ministry, Department of Chemistry, Shandong University, Jinan 250100 (P. R. China). Fax: 86 53188364218; Tel: 86 53188364218; E-mail: dfsun@sdu.edu.cn.

<sup>b</sup> Department of Chemistry, Liaocheng University, Liaocheng, 252059, P. R. China.

<sup>c</sup> Department of Chemistry, Zhejiang University, Hangzhou 310027, P. R. China.

**General Information.** Commercially available reagents were used as received without further purification. Elemental analyses (C, H, N) were performed with a PerkinElmer 240 elemental analyzer. Thermal gravimetric analysis (TGA) was performed under N<sub>2</sub> on a PerkinElmer TGA 7 instrument.

**Synthesis of 1.** H<sub>2</sub>L<sup>1</sup> (12.0 mg, 0.03 mmol), 1,3-dpp (4.8 mg, 0.024 mmol) and La(NO<sub>3</sub>)<sub>3</sub>·6H<sub>2</sub>O (23.4 mg, 0.054 mmol) were dissolved in 15 mL of dmf, EtOH, and H<sub>2</sub>O (v/v, 5:2:1) in a 20 ml Teflon-lined steel bomb. Then the Teflon-lined steel bomb was left at 90 °C for 3 days. The resulting colorless crystals were collected in 50%

yield. Elemental analysis calcd (%) for **1**: C 52.50, H 5.70, N 3.22; found: C 52.30, H 5.97, N 3.90 %. Selected IR peaks ( $\text{cm}^{-1}$ ): 3463 (s), 2943 (w), 1650 (s), 1599 (s), 1387 (s), 1115 (m), 1054 (m), 842 (m), 740 (m).

**Synthesis of complex 2.**  $\text{H}_2\text{L}^1$  (1.2 mg, 0.003 mmol), 1,3-dpp (0.5 mg, 0.0024 mmol) and  $\text{La}(\text{NO}_3)_3 \cdot 6\text{H}_2\text{O}$  (2.3 mg, 0.0054 mmol) were dissolved in 1.5 mL of dmf, EtOH, and  $\text{H}_2\text{O}$  (v/v, 5:2:1) in a glass tube. The glass tube was sealed and left at 90 °C for 3 days. The resulting colorless block crystals were collected in 60% yield. Elemental analysis calcd (%) for **2**: C 52.64, H 4.76; found: C 52.87, H 4.34. Selected IR peaks ( $\text{cm}^{-1}$ ): 3438 (s), 2936 (w), 1650 (s), 1591 (s), 1531 (s), 1378 (s), 1106 (m), 1054 (m), 842 (m), 731 (m).

**Synthesis of complex 3.**  $\text{H}_2\text{L}^1$  (4 mg, 0.01 mmol), 1,3-dpp (1.6 mg, 0.008 mmol) and  $\text{La}(\text{NO}_3)_3 \cdot 6\text{H}_2\text{O}$  (7.8 mg, 0.018 mmol) were dissolved in 1.5 mL of dmf, EtOH, and  $\text{H}_2\text{O}$  (v/v, 5:2:1) in a glass tube. The glass tube was sealed and left at 90 °C for 3 days. The resulting colorless block crystals were collected in 60% yield. Elemental analysis calcd (%) for **3**: C 52.84, H 5.64, N 3.85; found: C 51.67, H 5.33, N 3.46 %. Selected IR peaks ( $\text{cm}^{-1}$ ): 3336 (s), 2927 (w), 1676 (s), 1591 (s), 1548 (s), 1396 (s), 1054 (m), 859 (m).

**Crystal structure determination of 1-3:** Single-crystal X-ray diffraction was performed using a Bruker Apex II CCD diffractometer equipped with a fine-focus sealed-tube X-ray source (Mo  $\text{K}\alpha$  radiation, graphite monochromated). Structures were solved by direct methods using SHELXTL and were refined by full-matrix least-squares on  $F^2$  using SHELX-97. Non-hydrogen atoms were refined with

anisotropic displacement parameters during the final cycles. Hydrogen atoms were placed in calculated positions with isotropic displacement parameters set to  $1.2 \times U_{\text{eq}}$  of the attached atom.

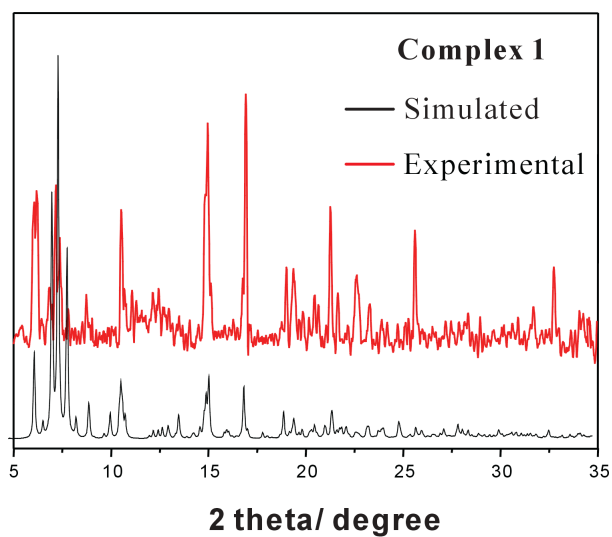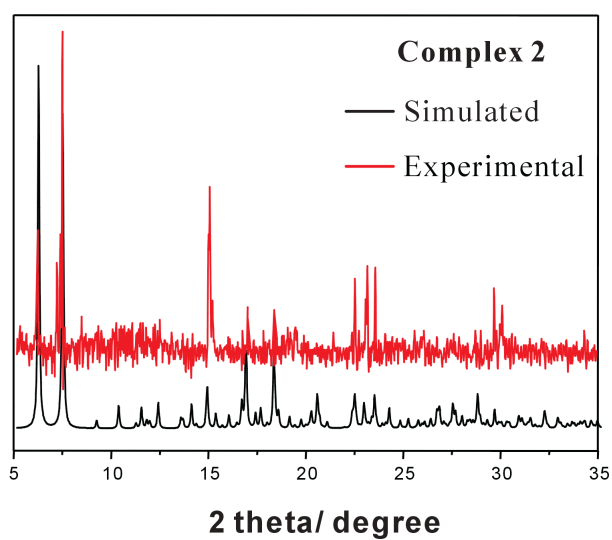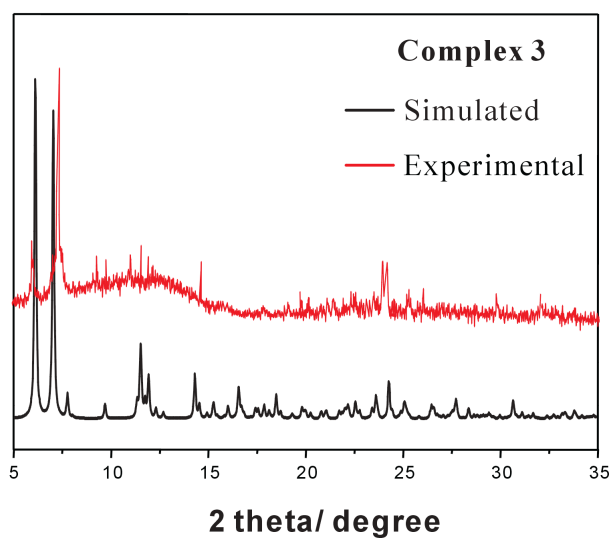

**Figure S1** The powder XRD patterns and the simulated one from the single-crystal diffraction data for 1-3

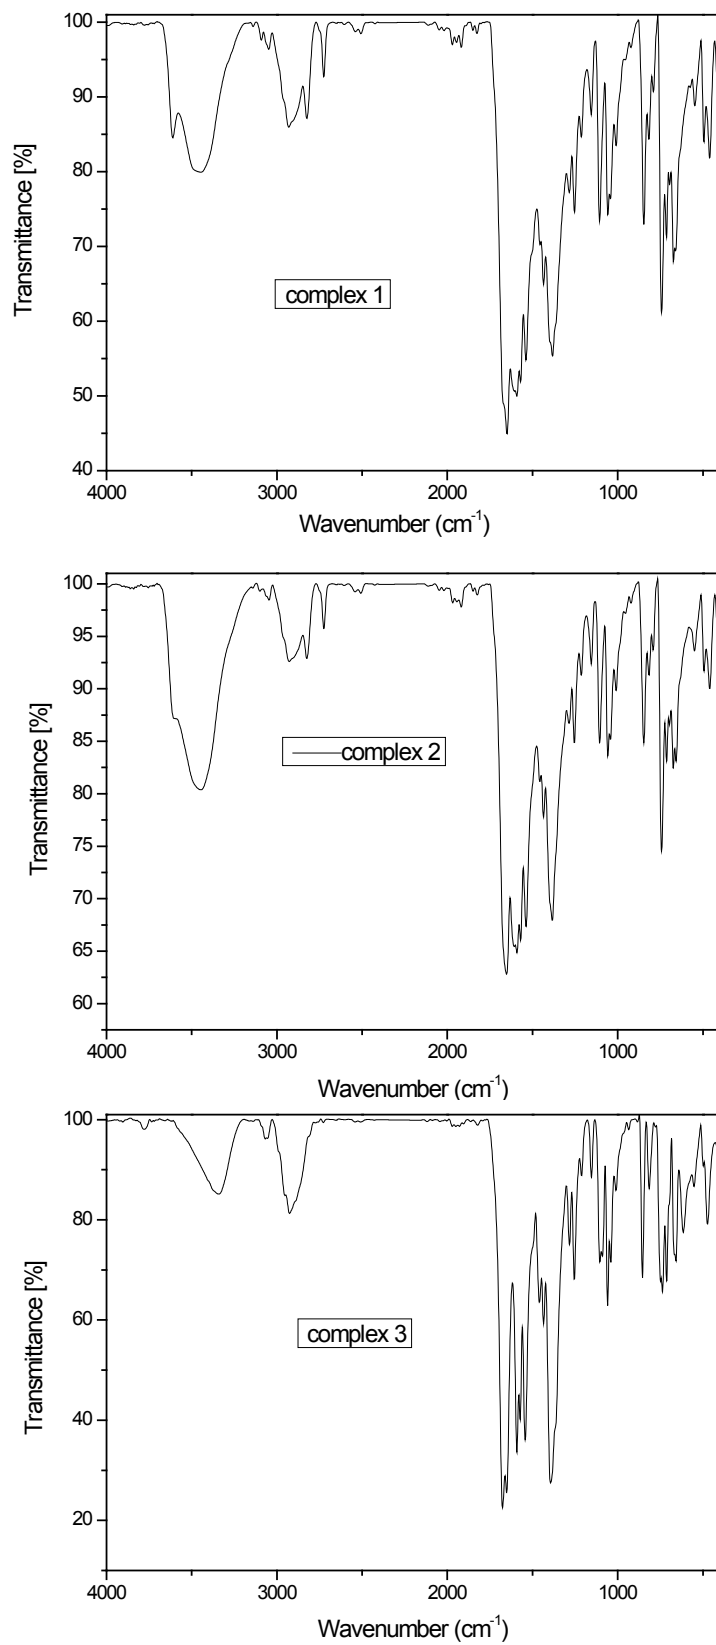

**Figure S2: IR spectra of 1-3**

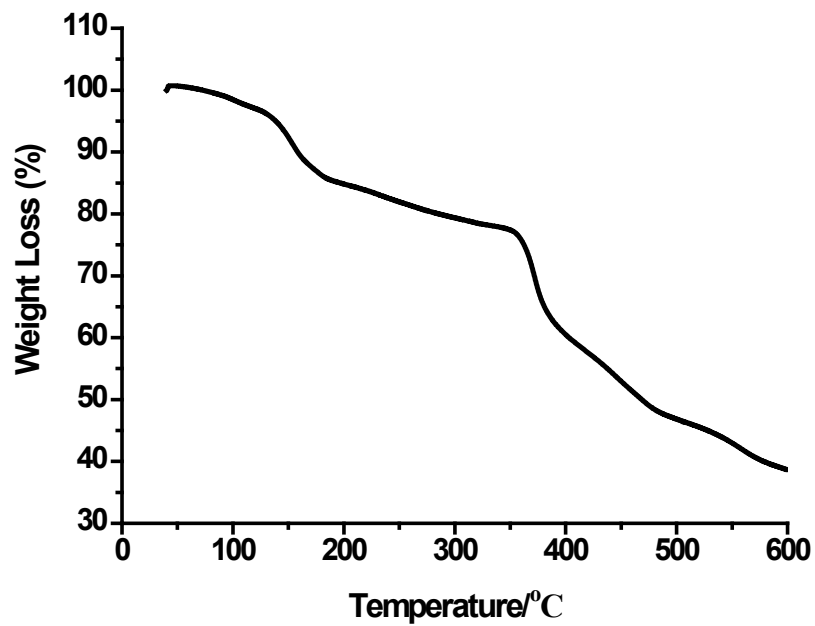

Figure S3. TGA for 1.

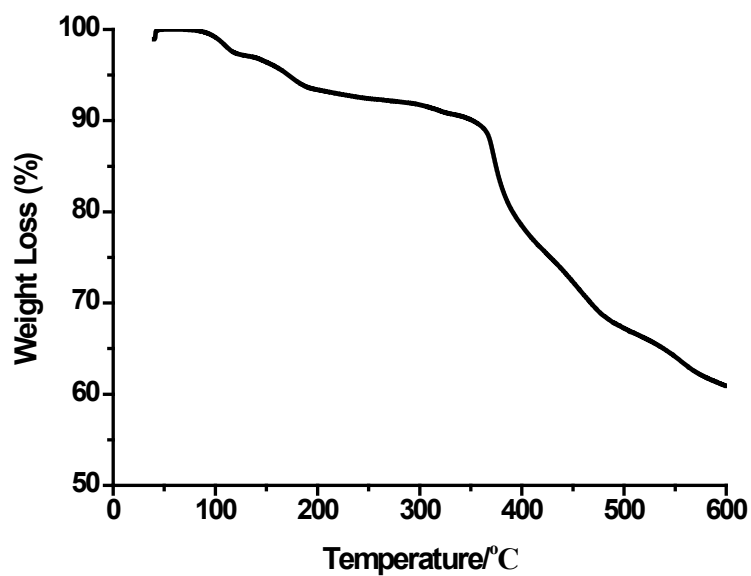

Figure S4 TGA for 2.

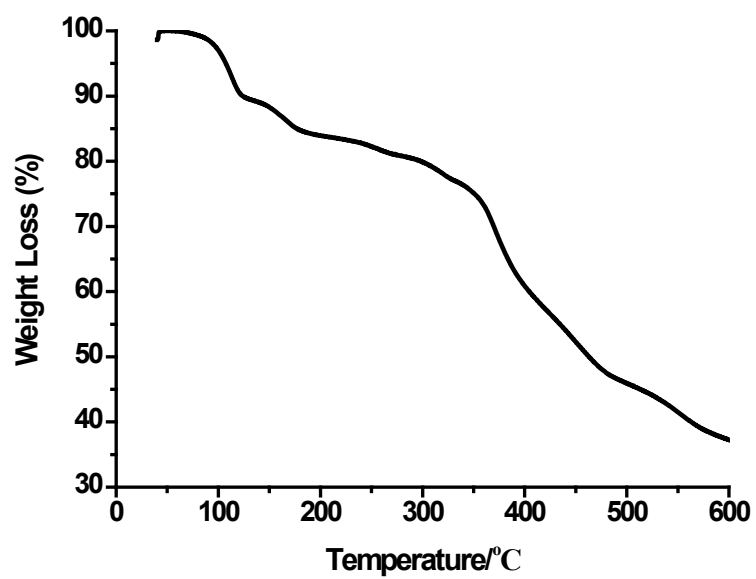

**Figure S5.** TGA for 3.
